# Supplementary material for: Phosphorous-modified ordered mesoporous carbon for catalytic dehydrogenation of propane to propylene
Source: Royal Society of Chemistry journal article supplement (doi:10.1039/c5ra06619k), 2015-01-01
Supplement: c5ra06619k1.pdf [file c5ra06619k1.pdf]

Table S1. Textural properties of different P loading catalysts.

| Sample    | $S_{\text{BET}}(\text{m}^2/\text{g})$ | $S_{\text{micro}}$ | $S_{\text{meso}}$ | $V_{\text{total}}(\text{cm}^3/\text{g})$ |
|-----------|---------------------------------------|--------------------|-------------------|------------------------------------------|
| 0.5%/OCMK | 1377                                  | 171                | 1207              | 1.35                                     |
| 1%P/OCMK  | 1338                                  | 165                | 1173              | 1.31                                     |
| 2%P/OCMK  | 1127                                  | 88                 | 1039              | 1.13                                     |
| 4%P/OCMK  | 1054                                  | 77                 | 977               | 1.07                                     |

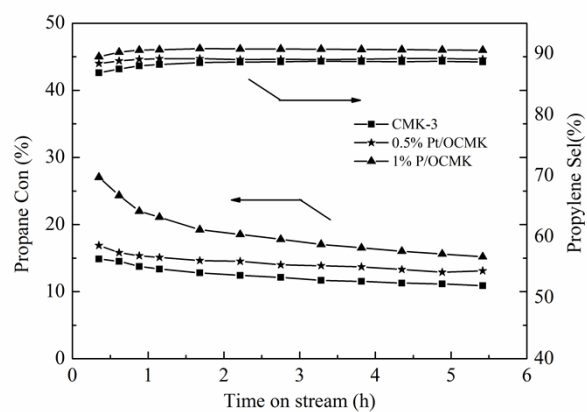

Fig. S1. Conversion and selectivity of the dehydrogenation of propane to Propylene over CMK-3, 0.5Pt/OCMK and 1%P/OCMK. (Catalyst: 0.10 g,  $C_3H_8/He$ : 1/19 mLmin<sup>-1</sup>, reaction temperature: 873K)

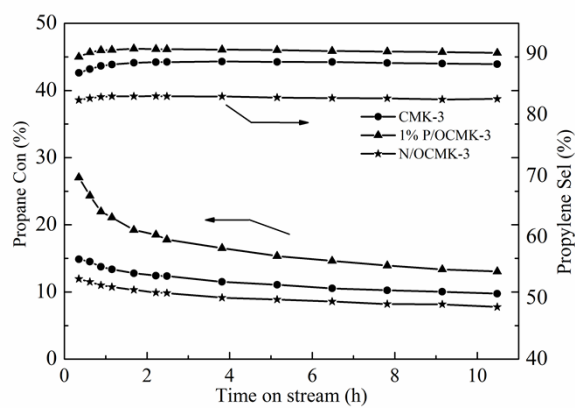

Fig. S2. Conversion and selectivity of dehydrogenation of propane to Propylene over CMK-3, 1%P/OCMK and N/OCMK. (Catalyst: 0.10 g, C<sub>3</sub>H<sub>8</sub>/He: 1/19 mLmin<sup>-1</sup>, reaction temperature: 873K)
